# Supplementary material for: Ultrastructural Characteristics of DHA-Induced Pyroptosis
Source: Springer Nature journal article supplement (doi:10.1007/s12017-019-08586-y), 2020-01-04
Supplement: MOESM1 [file 17989026]

Supplementary Material

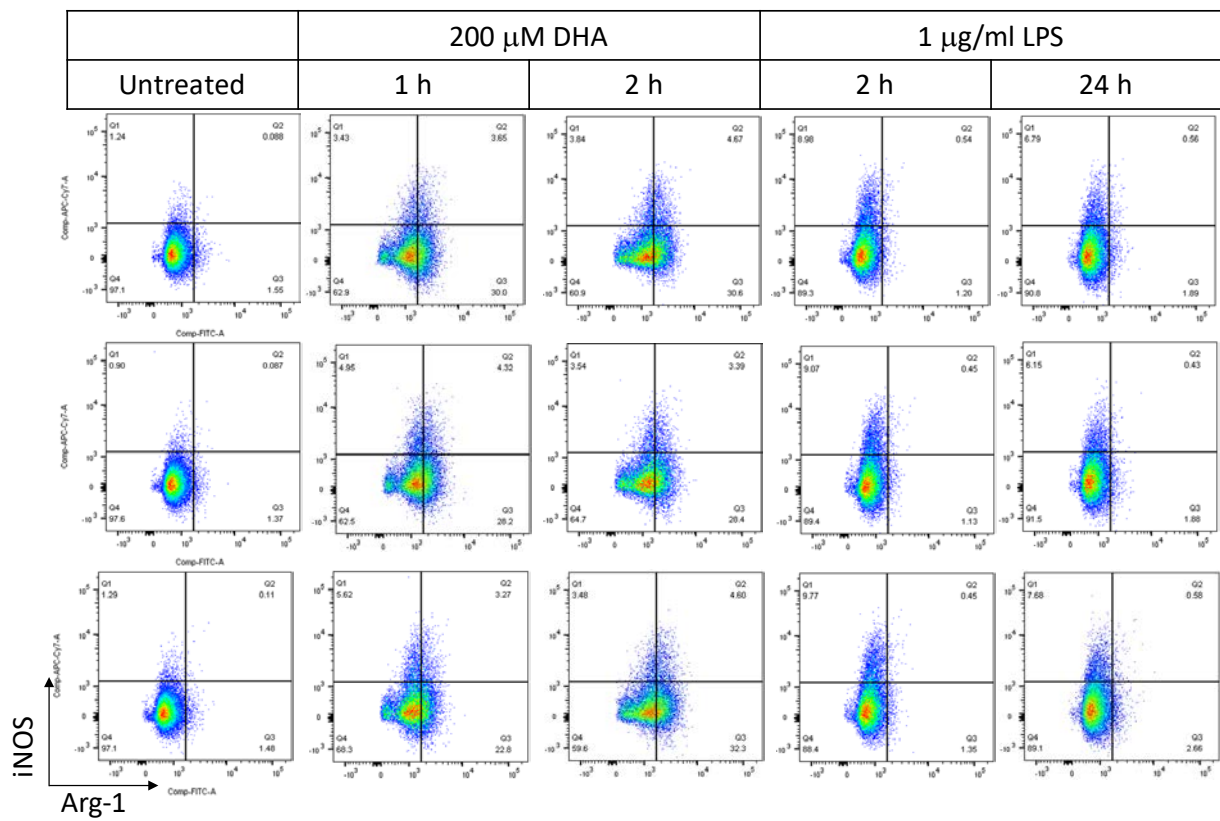

Supplemental Figure S1: Cells were treated with DHA or lipopolysaccharide (LPS) as indicated, then evaluated by flow cytometry for iNOS and ARG-1.

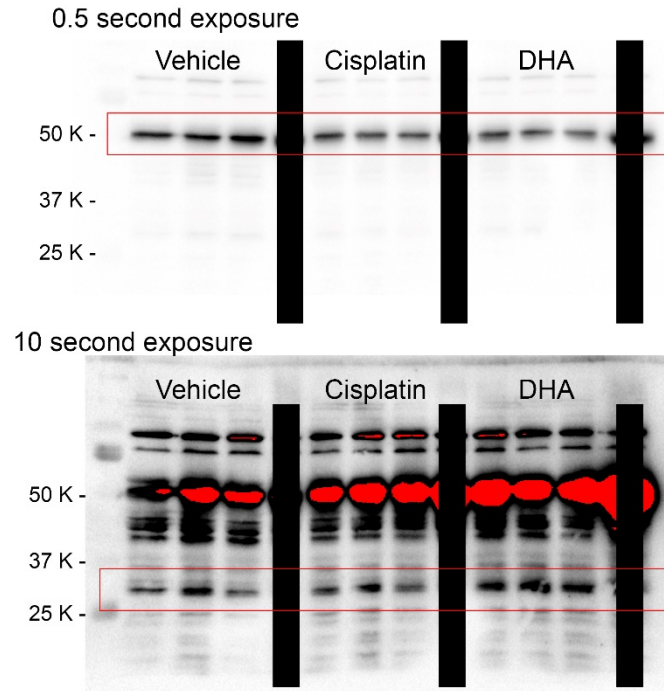

Supplemental Figure S2: Unmodified western blots. Cells were treated with vehicle, 200  $\mu$ M DHA, or 200  $\mu$ M cisplatin for 2 hours before collecting and evaluating for gasdermin D. Full length gasdermin D is apparent after 0.5 second exposure (upper panel, red box) while the cleaved fragment required a 10 second exposure for visualization (lower panel, red box).
